# Supplementary material for: Effect of Film Thickness on Microstructural and Magnetic Properties of Lithium Ferrite Films Prepared on Strontium Titanate (001) Substrates
Source: MDPI journal article supplement (doi:10.3390/coatings13122097), 2023-12-17
Supplement: s1 [file s1]

# Supplementary Materials: Effect of Film Thickness on Microstructural and Magnetic Properties of Lithium Ferrite Films Prepared on Strontium Titanate (001) Substrates

Kun Liu <sup>1</sup>, Ruyi Zhang <sup>2</sup>, Lu Lu <sup>3,\*</sup>, Jiankang Li <sup>1</sup> and Songyou Zhang <sup>1</sup>

<sup>1</sup> School of Electronics and Information Engineering, Suzhou Vocational University, Suzhou 215104, China; 92107@jssvc.edu.cn (K.L.); ljk@jssvc.edu.cn (J.L.); 92207@jssvc.edu.cn (S.Z.)

<sup>2</sup> Ningbo Institute of Materials Technology and Engineering, Chinese Academy of Sciences, Ningbo 315201, China; zhangruiyi@nimte.ac.cn

<sup>3</sup> Ji Hua Laboratory, Foshan 528200, China

\* Correspondence: lulu@jihualab.ac.cn

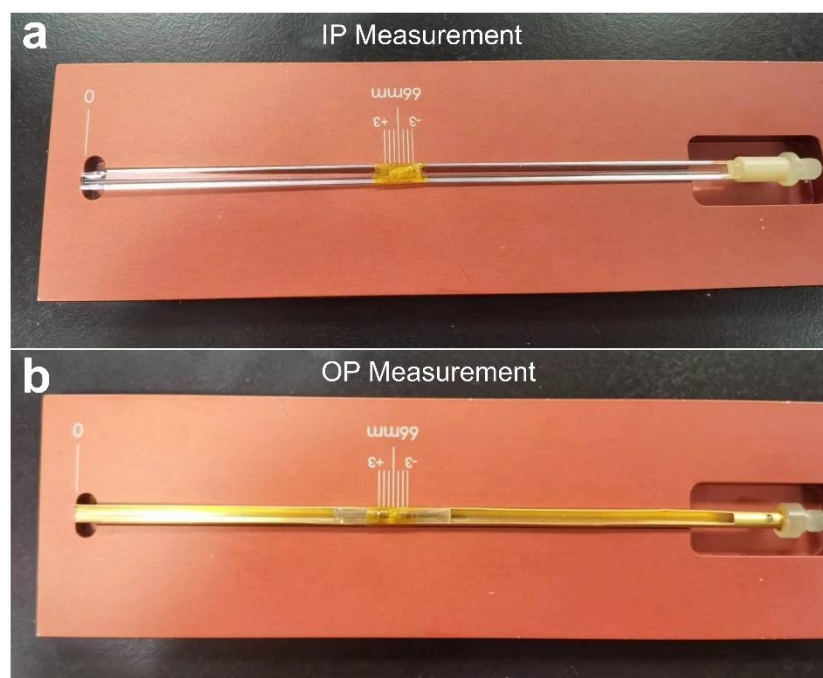

**Figure S1.** Magnetic set-up for (a) in-plane (IP) and (b) out-of-plane SQUID measurements.

The film sample is a rectangular sheet with a size of  $2.5 \times 5 \text{ mm}^2$  for in-plane measurement and  $2.5 \times 2.5 \text{ mm}^2$  for out-of-plane measurement. For in-plane measurement along the  $\text{SrTiO}_3$  [100] direction, the samples were wrapped in polyimide tape with the  $\text{SrTiO}_3$  [100] direction parallel to the quartz paddle (Figure S1a). For out-of-plane measurement along the  $\text{SrTiO}_3$  [001] direction, the samples were clamped with quartz cylinders and wrapped in the polyimide tape (Figure S1b).

**Table S1.** Saturation magnetization (Ms) of LiFe<sub>5</sub>O<sub>8</sub> films with different thicknesses grown on different substrates in the literature.

| Heterostructure                                                          | Film Thickness/nm | Ms (in plane/out of plane)/(emu/cc) | Ref       |
|--------------------------------------------------------------------------|-------------------|-------------------------------------|-----------|
| LiFe <sub>5</sub> O <sub>8</sub> /MgAl <sub>2</sub> O <sub>4</sub> (001) | 53                | 154/189                             | [10]      |
| LiFe <sub>5</sub> O <sub>8</sub> /Al <sub>2</sub> O <sub>3</sub> (0001)  | 60                | 152/118                             | [8]       |
| LiFe <sub>5</sub> O <sub>8</sub> /Al <sub>2</sub> O <sub>3</sub> (0001)  | 135               | 225/175                             | [8]       |
| LiFe <sub>5</sub> O <sub>8</sub> /MgO (001)                              | 100               | 120/--                              | [14]      |
| LiFe <sub>5</sub> O <sub>8</sub> /SrTiO <sub>3</sub> (001)               | 50                | 48(IP)                              | [36]      |
| LiFe <sub>5</sub> O <sub>8</sub> /SrTiO <sub>3</sub> (001)               | 100               | 60(IP)                              | [36]      |
| LiFe <sub>5</sub> O <sub>8</sub> /SrTiO <sub>3</sub> (001)               | 7.5               | 583/463                             | This work |
| LiFe <sub>5</sub> O <sub>8</sub> /SrTiO <sub>3</sub> (001)               | 30                | 204/154                             | This work |

**Table S2.** In-plane (IP) and out-of-plane (OP) magnetic parameters of 7.5 nm thick film and 30 nm thick film.

| Parameters (INP/OP)       | 7.5 nm (IP/OP)                      | 30 nm (IP/OP)                       |
|---------------------------|-------------------------------------|-------------------------------------|
| Ms(emu/cc)                | 583/463                             | 204/154                             |
| Hc(Oe)                    | 65/140                              | 215/166                             |
| Mr(emu/cc)                | 45/43                               | 71/15                               |
| Hk(Oe)                    | 13/29                               | 44/36                               |
| Ku/(J/m <sup>3</sup> )    | $3.19 \times 10^3/5.22 \times 10^3$ | $1.52 \times 10^3/1.54 \times 10^3$ |
| $K_{eff}/(J/m^3)$         | $+2.03 \times 10^3$                 | $+0.02 \times 10^3$                 |
| $K_{eff} \times t(J/m^2)$ | $1.52 \times 10^{-5}$               | $0.06 \times 10^{-5}$               |

**Disclaimer/Publisher's Note:** The statements, opinions and data contained in all publications are solely those of the individual author(s) and contributor(s) and not of MDPI and/or the editor(s). MDPI and/or the editor(s) disclaim responsibility for any injury to people or property resulting from any ideas, methods, instructions or products referred to in the content.
